# Supplementary material
Source: Research Square preprint supplement (doi:10.21203/rs.3.rs-9021280/v1)
Supplement: Supplementary file 1 [file ef4a6db64d4f27daf5848034.docx]

**Supplemental table 1** Primers and ssODNs used in this study.

| **Gene Symbol** | **Sequence (5′–3′)** |
| --- | --- |
| Target1  gRNA1 | GGCATCTGAGAATGCAGACC |
| Chemically modified  gRNA1 | mG*mG*mC*rArUrCrUrGrArGrArArUrGrCrArGrArCrCrGrUrUrUrUrArGrArGrCrUrArGrArArArUrArGrCrArArGrUrUrArArArArUrArArGrGrCrUrArGrUrCrCrGrUrUrArUrCrArArCrUrUrGrArArArArArGrUrGrGrCrArCrCrGrArGrUrCrGrGrUrGrCmU*mU*mU*rU |
| Target2  gRNA2 | TCAGCGACAGAAGATGTTGG |
| Chemically modified  gRNA2 | mU*mC*mA*rGrCrGrArCrArGrArArGrArUrGrUrUrGrGrGrUrUrUrUrArGrArGrCrUrArGrArArArUrArGrCrArArGrUrUrArArArArUrArArGrGrCrUrArGrUrCrCrGrUrUrArUrCrArArCrUrUrGrArArArArArGrUrGrGrCrArCrCrGrArGrUrCrGrGrUrGrCmU*mU*mU*rU |
| ssODN1 | A*C*CCTGTGGAGACCAACTGTAAGCATGTCTTTTGCaGGGTCgGCATTCTCAGATGCCTCAAAGTCATGGGCAGCTATTGT*C*C |
| ssODN2 | A*G*ATTTTTGTGCACATTAATAAAGGGGGCCGGCCCCGCCAACATCTGTCGCTGACTCGGAGAGCTCAGAAGCACCGGCTGA*G*G |
| *RAG1*  (PCR) | F: AGCTCCTTGCAGTGGACTTC |
| R: ATCAGCTTGCCTGTGCTCAT |
| *RAG1*  (Real-time PCR) | F: AAAGCCATCACAGGGAGACAG |
| R: CAGCCCATCAATAATGCCAAC |
| *RAG2*  (Real-time PCR) | F: GGACGCTCATACATGCCTTCT |
| R: GGCAAGTGAATGTCCTCCTAAA |
| *FOXO1*  (Real-time PCR) | F: AAGAGCGTGCCCTACTTCAA |
| R: TTCCTTCATTCTGCACACGA |
| *AKT*  (Real-time PCR) | F: TGGACTACCTGCACTCGGAGAA |
| R: GTGCCGCAAAAGGTCTTCATGG |
| *β-actin*  (Real-time PCR) | F: CTGGAACGGTGAAGGTGACA |
| R: TGGGGTGGCTTTTAGGATGG |
